# Supplementary figures and images for: Allodepleted T‐cell immunotherapy after haploidentical haematopoietic stem cell transplantation without severe acute graft‐versus‐host disease (GVHD) in the absence of GVHD prophylaxis
Source: PubMed Central journal article supplement — Br J Haematol. 2019 May 28;186(5):754–66. doi: 10.1111/bjh.15970 (PMC6771482; doi:10.1111/bjh.15970), 2019-05-28

**S1A.** *CD19<sup>+</sup> B cells*

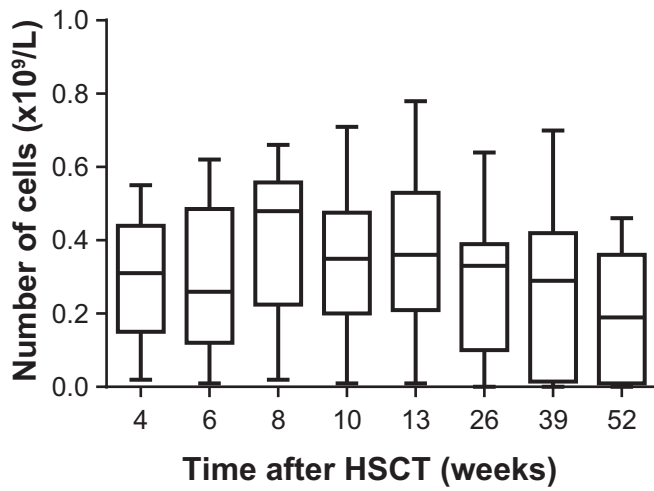

**S1B.** *CD56<sup>+</sup> NK cells*

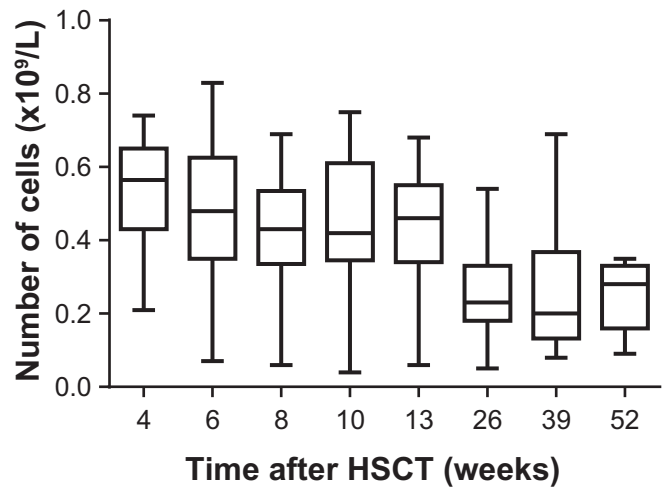

Supplement: BJH-186-754-s001.pdf [file BJH-186-754-s001.pdf]

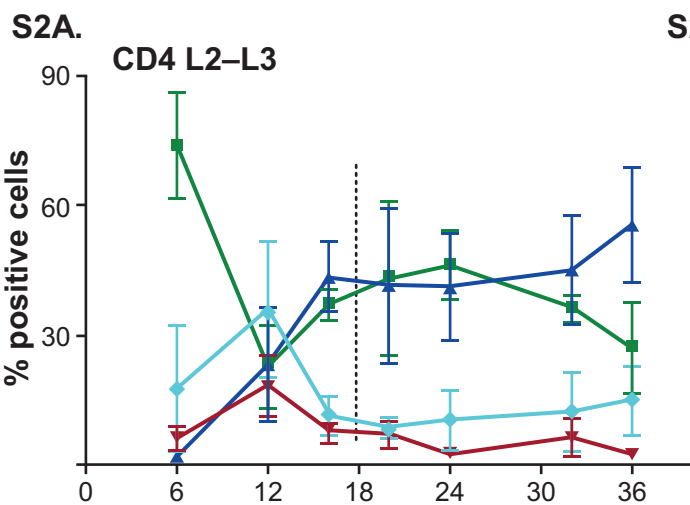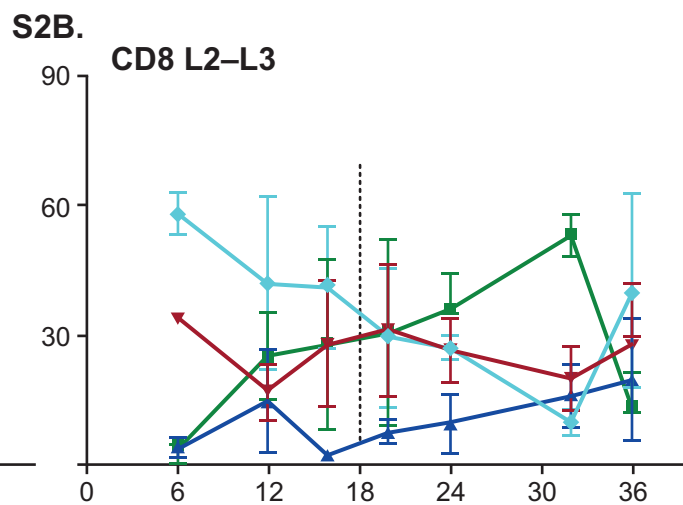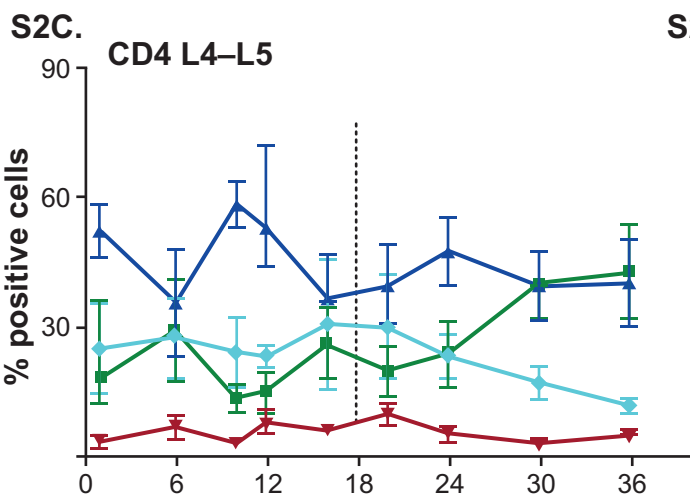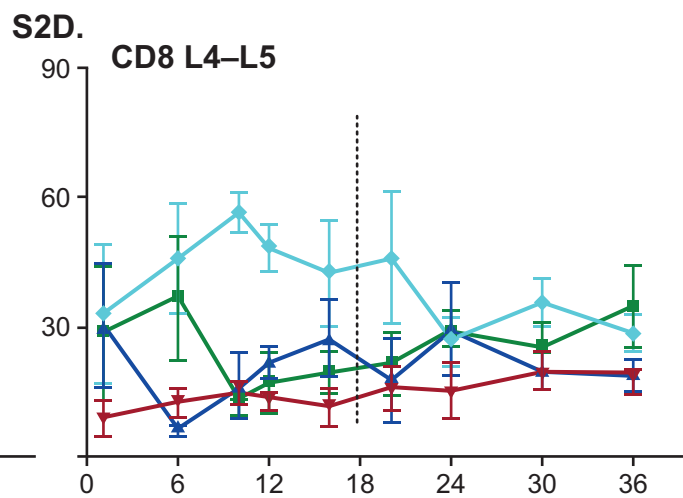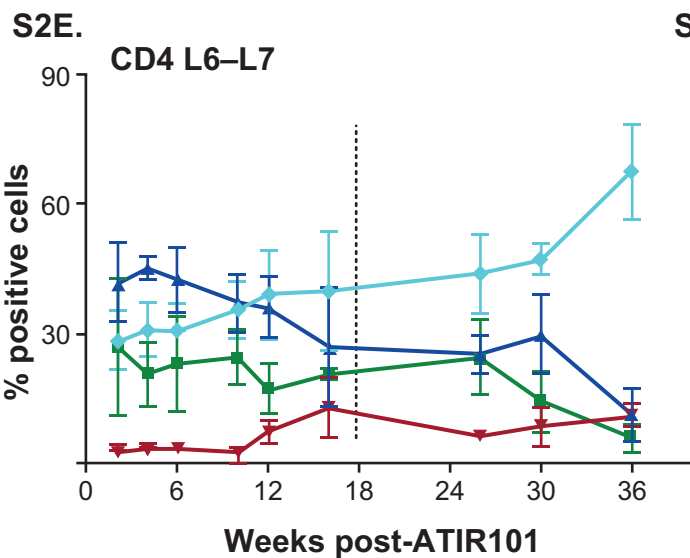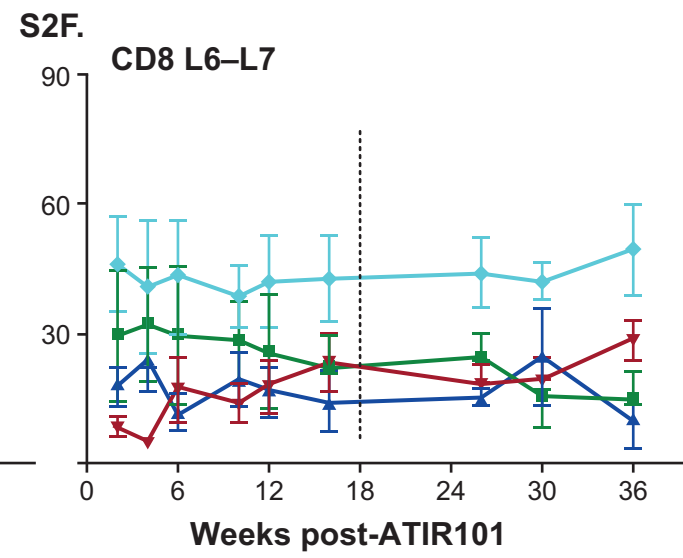

—  $T_{EM}$       —  $T_{EMRA}$   
—  $T_{CM}$       —  $T_{NAIVE}$

Supplement: BJH-186-754-s002.pdf [file BJH-186-754-s002.pdf]
